# Supplementary material
Source: publisher figshare collection journal article supplement (https://tandf.figshare.com/ndownloader/files/15045773)
Supplement: Supplementary file 1 [file 15045773]

## Sheet: Clast count
Location description	Formation	Latitude	Longitude	Clast size	Metasedimentary	Vein quartz	Unweathered granitoids	Weathered granitoid	Volcanics	Grey sedimentary	Cream siltstone	Schist/foliated metamorphics	Chert	Matrix	SUM clasts
Paturau River	Rakopi	-40.683	172.485	very coarse pebble	100	0	0	0	0	0	0	0	0	84	100
Paturau River	Rakopi	-40.6826	172.484	coarse pebble	85	5	0	0	10	0	0	0	0	32	100
Paturau River	Rakopi	-40.6812	172.484	coarse pebble	141	7	1	0	2	0	0	0	0	42	151
Maori Point	North Cape	-40.5804	172.626	coarse pebble	115	17	47	0	15	0	0	7	0	57	201
Maori Point	North Cape	-40.4804	172.626	coarse pebble	151.5	26.5	28	0	4.5	5	0	0	0	51	215.5
Pecks Point S	North Cape	-40.5729	172.634	coarse pebble	135.171	24.3721	35.6841	0	15.6066	5.33333	0	1.33333	0	34.5271	217.5
Pecks Point S	North Cape	-40.5724	172.634	coarse pebble	118	22	52	0	13	4	0	5	0	57	214
Pecks Point S	North Cape	-40.5712	172.631	coarse pebble	128	28.5	31.5	0.5	4.5	6	0	3	0	43.5	202
Pecks Point N	North Cape	-40.569	172.627	coarse pebble	110	23	35	4	19	11	0	5	0	87	207
Nguroa Road	North Cape	-40.5351	172.639	very coarse pebble	141	11	37	0	8	0	0	0	0	64	197
Moki Point	North Cape	-40.5814	172.573	medium pebble	137	37	20	1	6	0	0	6	0	60	207
Moki Point S	Farewell	-40.5848	172.569	medium pebble	129	28	14	0	7	0	0	3	3	99	184
Oyster Point	Farewell	-40.5666	172.597	very coarse pebble	139	5	8	0	0	0	0	1	0	99	153
Wharariki S	Farewell	-40.5058	172.666	very coarse pebble	175	19	0	10	3	13	4	0	0	28	224
Wharariki mid	Farewell	-40.5043	172.673	very coarse pebble	161	14	1	4	3	13	3	4	0	20	203
Wharariki N	Farewell	-40.5009	172.68	cobble	150	22	3	4	0	6	15	1	0	66	201
Green Hills S	Farewell	-40.5084	172.65	very coarse pebble	142	25	20	2	17	3	2	0	1	42	212
Green Hills N	Farewell	-40.5068	172.655	very coarse pebble-cobble	138	10	10	19	12	10	8	1	0	69	208
Pillar Point	Farewell	-40.5076	172.712	cobble	152	15	0	16	1	24	10	2	0	134	220
Pillar Point	Farewell	-40.5072	172.714	cobble	188	15	0	2	2	4	2	0	0	40	213
Pillar Point	Farewell	-40.5046	172.713	cobble - boulder	177	7	0	3	0	13	8	0	0	37	208
Puponga Point	Farewell	-40.5248	172.737	very coarse pebble	157	11	0	17	1	19	8	0	0	76	213
Puponga Point	Farewell	-40.5251	172.738	very coarse pebble	147	14	0	6	1	9	23	2	0	75	202

## Sheet: Clast XRF
Sample	UC collection no.	Unit	Location	Latitude (WGS 84)	Longitude (WGS 84)	Formation	Clast type	Granitoid grouping	SiO2	TiO2	Al2O3	Fe2O3	MnO	MgO	CaO	Na2O	K2O	P2O5	LOI	SUM	As	Ba	Ce	Cr	Cu	Ga	La	Nb	Ni	Pb	Rb	Sc	Sr	Th	U	V	Y	Zn	Zr
Mo028	21183	North Cape Formation	Moki Point	-40.5814	172.573	North Cape	Grey metasediment		81.4787	0.246169	10.2223	1.31947	0.0492338	0.797588	0.0689273	1.45732	3.0328	0.0295403	1.53236	100.234	1	300	37	41	9	16	17	14	9	31	92	10	53	13	3	45	15	31	135
MP037	21229	North Cape Formation	Maori Point	-40.5804	172.626	North Cape	Grey metasediment		90.0194	0.248836	5.2717	0.378231	0.00995346	0.119441	0.0298604	1.62241	1.70204	0.0199069	0.465419	99.8872	2	704	35	22	<1	3	28	6	1	14	43	5	72	8	1	19	15	5	239
OP076	21234	Farewell Formation	Oyster Point	-40.5666	172.597	Farewell	Grey metasediment		94.5598	0.228648	2.35786	0.685944	0.00994121	0.298236	0.0397649	0.367825	0.636238	0.0397649	0.587868	99.8119	1	684	62	40	<1	3	41	6	1	10	25	2	29	8	1	20	14	10	321
OP076	21234	Farewell Formation	Oyster Point	-40.5666	172.597	Farewell	Grey metasediment		94.4851	0.228684	2.32826	0.686053	0.0099428	0.298284	0.0397712	0.347998	0.626397	0.049714	0.571973	99.6721	1	698	69	46	<1	3	44	5	<1	9	27	4	29	8	2	19	14	11	311
Pi124.1	21196	Farewell Formation	Pillar Point	-40.5076	172.712	Farewell	Cream metasediment		91.2089	0.217122	5.09812	0.217122	0.00986917	0.138168	0.0197383	0.157907	1.30273	0.00986917	1.30826	99.6878	1	330	46	22	<1	6	25	6	3	6	44	5	14	7	1	27	9	6	201
Pi124.2	21197	Farewell Formation	Pillar Point	-40.5076	172.712	Farewell	Cream metasediment		90.9085	0.177622	5.48422	0.335508	0.00986787	0.197357	0.00986787	0.13815	1.33216	0.00986787	1.32131	99.9245	1	329	38	21	<1	6	22	5	2	3	49	5	8	4	2	23	10	11	156
PP165	21238	North Cape Formation	Pecks Point S	-40.5712	172.631	North Cape	Grey metasediment		83.2888	0.40636	8.65592	0.991123	0.00991123	0.525295	0.0594674	2.18047	2.40843	0.0297337	0.887708	99.4432	1	676	52	38	<1	10	21	9	2	13	82	7	78	8	3	38	15	14	344
Pu214	21249	Farewell Formation	Puponga (river)	-40.5248	172.737	Farewell	Grey metasediment		93.8623	0.187765	3.36673	0.20753	0.00988237	0.108706	0.0197647	0.247059	0.721413	0.0197647	1.17628	99.9272	2	280	50	17	<1	5	20	5	2	16	22	6	12	5	1	23	13	10	202
Pu228	21252	Farewell Formation	Puponga (from salt marsh)	-40.526	172.737	Farewell	Quartzite		94.833	0.228292	2.924	0.129034	0.00992572	0.0893315	0.0198514	0.228292	0.585618	0.0198514	0.742767	99.8099	<1	251	44	31	<1	5	26	5	1	5	45	2	8	9	2	22	11	8	206
Pi083	21194	Farewell Formation	Pillar Point	-40.5046	172.713	Farewell	Cream siltstone		82.5412	0.410481	12.1145	0.238652	0.00954606	0.0286382	0.0190921	0.114553	0.0859146	0.0381842	4.53939	100.14	14	79	61	53	10	13	32	20	1	26	6	11	74	18	6	66	51	3	334
Pi083	21194	Farewell Formation	Pillar Point	-40.5046	172.713	Farewell	Cream siltstone		77.1531	0.861925	15.6433	0.208377	0.0094717	0.0757736	0.0189434	0.132604	0.634604	0.0378868	5.28301	100.059	5	78	140	87	2	17	74	18	2	10	28	15	28	21	5	100	49	5	293
Pu210	21246	Farewell Formation	Puponga (river)	-40.5248	172.737	Farewell	Cream siltstone		67.4127	0.914739	21.2107	0.619066	0.00923979	0.277194	0.0369592	0.406551	1.27509	0.0184796	7.6021	99.7828	10	374	20	49	2	21	6	15	16	11	41	23	18	12	4	143	21	18	149
Pu212	21247	Farewell Formation	Puponga (river)	-40.5248	172.737	Farewell	Cream siltstone		86.05	0.419411	8.2193	0.204828	0.00975374	0.136552	0.0195075	0.302366	1.74592	0.00975374	2.46265	99.58	1	598	25	48	<1	9	15	9	<1	11	37	10	26	6	2	56	9	7	500
GH379	21177	Farewell Formation	Green Hills Beach	-40.5068	172.655	Farewell	Weathered granitoid	High LOI	49.5319	1.29707	26.3001	8.15037	0.0827916	2.06979	0.58874	0.68993	2.87931	0.413958	8.00936	100.013	6	524	49	32	32	34	30	28	22	18	112	12	68	13	4	111	17	106	738
GH381	21179	Farewell Formation	Green Hills Beach	-40.5068	172.655	Farewell	Granitoid	S3	77.0265	0.119713	12.7495	0.209498	0.0399044	0.0997611	0.259379	4.43937	4.41942	0.0199522	0.238923	99.6218	2	53	52	<1	<1	18	26	17	<1	15	219	<2	33	23	2	4	6	16	114
GH382	21180	Farewell Formation	Green Hills Beach	-40.5084	172.65	Farewell	Weathered granitoid	High LOI	63.5419	0.815103	21.5674	1.93938	0.065583	1.24608	0.365391	2.00497	1.78948	0.196749	6.31	99.8421	1	211	40	<1	3	15	24	15	10	18	90	12	131	16	5	72	16	79	382
Mo027	21182	North Cape Formation	Moki Point	-40.5814	172.573	North Cape	Weathered granitoid	A	72.4136	0.295593	15.373	1.22178	0.00985309	0.463095	0.246327	3.64564	4.32551	0.0788248	1.46906	99.5423	1	1043	128	7	<1	19	75	9	6	13	176	2	366	14	2	27	12	30	176
MP038	21230	North Cape Formation	Maori Point	-40.5804	172.626	North Cape	Granitoid	A	71.4782	0.346754	15.1144	1.76349	0.0198145	0.416104	0.663785	3.92327	5.0527	0.039629	0.92754	99.7457	1	609	123	6	<1	18	73	20	2	25	219	10	224	30	3	20	18	34	255
MP039	21184	North Cape Formation	Maori Point	-40.5804	172.626	North Cape	Granitoid	S2	70.9654	0.26784	16.0948	0.605119	0.00991999	0.12896	0.902719	4.65247	5.08895	0.02976	0.800125	99.5461	1	1250	11	<1	<1	18	10	17	<1	14	124	<2	468	14	2	11	6	11	206
MP343	21189	North Cape Formation	Maori Point	-40.4804	172.626	North Cape	Granitoid	A	73.7043	0.228798	14.0462	1.66127	0.0198954	0.358118	0.935086	3.70055	4.27752	0.0497386	0.522755	99.5042	2	784	28	2	<1	13	26	11	3	26	121	2	244	14	1	16	7	26	177
MP356	21190	North Cape Formation	Maori Point	-40.4804	172.626	North Cape	Granitoid	S3	76.0008	0.109614	13.2833	0.518177	0.00996495	0.0498248	0.159439	4.38458	4.85293	0.0199299	0.350492	99.739	1	118	148	<1	<1	18	127	17	<1	9	260	4	59	21	3	7	15	11	104
NR366	21191	Farewell Formation	Nguroa Road	-40.5351	172.639	Farewell	Granitoid	S3	75.08	0.119721	13.6083	0.698371	0.0698371	0.129698	0.438976	4.63918	4.56934	0.0199535	0.232658	99.606	1	176	36	<1	<1	23	17	48	<1	40	383	4	97	46	11	6	7	22	139
NR368	21192	Farewell Formation	Nguroa Road	-40.5351	172.639	Farewell	Granitoid	S3	76.6874	0.119731	12.9808	0.279372	0.0199551	0.0997756	0.169619	4.39013	4.73934	0.00997756	0.224409	99.7205	<1	95	59	<1	<1	18	36	18	1	11	237	<2	40	29	2	4	7	18	114
OP071	21231	Farewell Formation	Oyster Point	-40.5666	172.597	Farewell	Granitoid	A	69.5077	0.367456	15.5303	3.11841	0.0496563	0.516425	0.913675	3.91291	4.97556	0.0496563	0.687493	99.6292	2	567	104	4	<1	19	70	24	1	28	207	4	224	34	4	16	8	38	305
OP072	21232	Farewell Formation	Oyster Point	-40.5666	172.597	Farewell	Granitoid	A	73.8029	0.286142	14.1506	1.73659	0.0197339	0.335477	0.355211	2.33847	5.48603	0.0296009	1.33036	99.8711	2	757	67	3	<1	19	37	21	3	29	246	2	177	26	2	20	7	29	234
OP075	21233	Farewell Formation	Oyster Point	-40.5666	172.597	Farewell	Granitoid	A	76.6301	0.119647	13.0065	0.249265	0.0199412	0.0797647	0.219353	4.20759	4.8457	0.0199412	0.294144	99.692	2	86	27	<1	<1	18	15	18	<1	11	256	3	31	21	2	6	4	13	120
Pi085	21195	Farewell Formation	Pillar Point	-40.5046	172.713	Farewell	Weathered granitoid	High LOI	75.8226	0.145083	14.6149	0.08705	0.0193444	0.0290167	0.0193444	0.222461	5.64858	0.0193444	3.27781	99.9056	<1	33	34	19	<1	20	19	22	2	18	213	6	15	25	3	30	7	9	155
Pi306	21198	Farewell Formation	Pillar Point	-40.5046	172.713	Farewell	Weathered granitoid	High LOI	70.5695	0.947026	20.2218	0.269252	0.00928457	0.0464228	0.0278537	0.10213	0.352814	0.064992	7.15432	99.7654	3	79	220	76	<1	21	126	21	2	26	19	23	66	25	6	122	76	7	311
Pi312.1	21202	Farewell Formation	Pillar Point	-40.507	172.714	Farewell	Weathered granitoid	High LOI	69.0117	0.463877	19.6248	0.681615	0.00946687	0.0946687	0.0189337	0.246139	4.26009	0.0189337	5.33126	99.7615	2	602	77	30	1	20	43	26	3	34	113	12	101	36	6	67	12	19	329
PP147.1	21203	North Cape Formation	Pecks Point S	-40.5729	172.634	North Cape	Granitoid	S3	77.364	0.0994793	12.5271	0.547136	0.00994793	0.0795834	0.149219	3.94933	4.47657	0.0198959	0.520737	99.7429	3	48	43	5	<1	19	26	20	1	8	234	<2	20	17	1	8	13	12	94
PP147.2	21204	North Cape Formation	Pecks Point S	-40.5729	172.634	North Cape	Granitoid	S1	71.7269	0.179177	16.0865	0.62712	0.0298628	0.248857	1.5031	5.37531	3.31477	0.0298628	0.45722	99.5787	1	956	<5	<1	<1	20	15	5	1	23	81	<2	944	4	<1	11	1	30	115
PP147.3	21205	North Cape Formation	Pecks Point S	-40.5729	172.634	North Cape	Granitoid	S1	71.8445	0.189071	15.9514	0.616969	0.0199022	0.26868	1.13443	5.62238	3.37343	0.0199022	0.488852	99.5295	<1	980	14	<1	<1	17	10	4	1	18	99	5	755	6	2	6	2	29	125
PP151.1	21208	North Cape Formation	Pecks Point S	-40.5729	172.634	North Cape	Granitoid	A	74.8022	0.256904	13.4159	1.4525	0.00988094	0.345833	0.790475	3.07297	4.4069	0.0395238	1.19058	99.7837	3	825	57	4	<1	15	28	16	1	26	120	4	223	18	3	15	6	17	211
PP151.2	21209	North Cape Formation	Pecks Point S	-40.5729	172.634	North Cape	Granitoid	S3	77.557	0.119503	12.4904	0.248964	0.00995856	0.0597514	0.149378	3.96351	4.75023	0.00995856	0.414416	99.7731	1	47	59	5	<1	19	23	20	1	13	259	2	14	21	2	4	13	10	119
PP151.3	21210	North Cape Formation	Pecks Point S	-40.5729	172.634	North Cape	Granitoid	S1	68.6635	0.228799	17.0258	0.954989	0.0198956	0.208904	1.30316	4.47651	6.14774	0.0298434	0.522017	99.5812	<1	1775	10	3	<1	17	6	5	1	28	128	2	527	9	1	10	3	16	397
PP156.1	21235	North Cape Formation	Pecks Point N	-40.569	172.627	North Cape	Granitoid	A	72.4013	0.315981	14.3994	2.01438	0.0197488	0.513469	0.473972	3.23881	4.80884	0.0197488	1.25588	99.4615	<1	932	109	4	<1	18	55	20	3	15	233	3	147	26	5	15	8	28	277
PP156.2	21211	North Cape Formation	Pecks Point N	-40.569	172.627	North Cape	Granitoid	High LOI	58.3994	1.78456	17.906	4.57113	0.0381723	1.93724	0.954308	3.73134	5.4491	0.143146	4.56923	99.4836	2	983	39	43	6	27	30	38	22	16	172	11	757	25	5	103	7	80	539
PP157.2	21236	North Cape Formation	Pecks Point N	-40.569	172.627	North Cape	Granitoid	A	72.7492	0.324313	14.5584	1.06139	0.00982766	0.304658	0.29483	3.21365	5.24797	0.0393107	1.72337	99.5269	2	627	110	6	<1	17	63	20	<1	18	208	2	186	26	2	17	13	18	251
PP166.1	21239	North Cape Formation	Pecks Point S	-40.5712	172.631	North Cape	Granitoid	S1	72.4721	0.268791	15.1223	0.647089	0.0199104	0.219015	0.716775	4.37034	5.45546	0.0298656	0.447891	99.7696	1	798	18	3	<1	18	16	12	1	13	135	2	221	8	1	6	5	17	239
PP166.2	21240	North Cape Formation	Pecks Point S	-40.5712	172.631	North Cape	Granitoid	A	71.6527	0.318217	15.1954	2.04852	0.0198886	0.48727	0.606602	4.39538	4.66387	0.0198886	0.557068	99.9648	1	545	86	2	<1	18	57	19	2	17	183	1	227	15	2	17	14	31	224
PP167	21241	North Cape Formation	Pecks Point S	-40.5712	172.631	North Cape	Granitoid	S1	73.5812	0.0993737	14.448	0.268309	0.00993737	0.178873	0.645929	2.08685	7.76108	0.0397495	0.626338	99.7456	1	1588	34	<1	<1	14	19	8	1	19	210	5	535	7	2	5	6	11	47
PP173	21242	North Cape Formation	Pecks Point S	-40.5712	172.631	North Cape	Granitoid	S1	73.6157	0.328176	14.4288	0.397789	0.00994473	0.228729	1.0442	3.79889	5.12153	0.0497236	0.552741	99.5762	<1	692	79	3	<1	14	48	8	3	14	93	7	425	7	1	12	5	24	173
PP183.1	21213	North Cape Formation	Pecks Point S	-40.5724	171.634	North Cape	Granitoid	A	70.8965	0.365578	15.1729	2.45036	0.0296414	0.61259	0.513785	3.85339	4.72287	0.0296414	1.19522	99.8425	1	573	82	8	<1	18	46	20	2	20	221	4	228	27	3	20	18	36	243
PP183.2	21214	North Cape Formation	Pecks Point S	-40.5724	171.634	North Cape	Granitoid	A	71.9741	0.386421	14.6479	2.17981	0.0396329	0.535044	0.990823	4.26054	3.92366	0.0396329	0.917733	99.8953	3	494	64	8	<1	18	31	22	2	17	178	4	220	27	3	21	16	52	283
PP184.1	21244	North Cape Formation	Pecks Point S	-40.5724	171.634	North Cape	Granitoid	A	73.1164	0.228543	14.1084	1.34145	0.0198733	0.228543	0.725376	3.9846	4.84909	0.0397466	0.633451	99.2754	3	1031	102	2	1	16	64	16	<1	14	154	2	208	17	2	9	12	13	209
PP187	21245	North Cape Formation	Pecks Point S	-40.5724	171.634	North Cape	Pegmatite	S2	82.2371	0.0398865	9.64186	0.169518	0.00997162	0.079773	0.468666	2.06413	4.63681	0.00997162	0.283755	99.6414	1	698	8	19	<1	11	<5	2	5	14	156	1	317	24	4	1	2	6	69
PP188	21215	North Cape Formation	Pecks Point S	-40.5724	171.634	North Cape	Granitoid	A	71.0179	0.228474	16.1331	0.546351	0.00993366	0.0894029	0.178806	5.50325	5.1953	0.029801	0.663405	99.5957	2	416	106	<1	<1	19	53	19	<1	20	128	<2	100	17	2	11	18	16	364
PP289	21216	North Cape Formation	Pecks Point S	-40.5709	172.631	North Cape	Granitoid	S2	65.0449	0.299033	19.8658	0.149517	0.00996777	0.0598066	1.21607	5.26298	7.39609	0.0199355	0.322301	99.6463	<1	1061	39	<1	<1	21	32	14	1	12	321	<2	600	15	4	15	7	5	224
Pu223	21250	Farewell Formation	Puponga (river)	-40.5251	172.737	Farewell	Granitoid	High LOI	71.7031	0.959005	17.4459	0.614508	0.00931073	0.316565	0.0465537	0.76348	1.01487	0.0372429	6.8927	99.8032	28	283	109	59	27	20	62	16	1	39	36	23	27	14	4	128	24	27	170
Pu225	21251	Farewell Formation	Puponga (from salt marsh)	-40.526	172.737	Farewell	Weathered granitoid	High LOI	76.713	0.173855	14.0911	0.106245	0.00965862	0.0386345	0.0193172	0.270441	4.98385	0.00965862	3.41384	99.8296	2	37	26	14	<1	21	15	23	1	20	257	5	12	11	3	22	5	5	162
Pu225	NA	Farewell Formation	Puponga (from salt marsh)	-40.526	172.737	Farewell	Weathered granitoid	High LOI	76.7377	0.173867	14.0824	0.106252	0.00965928	0.0386371	0.0193186	0.289778	4.96487	0.00965928	3.40722	99.8393	1	42	32	13	<1	19	17	24	2	20	254	9	12	11	4	18	4	4	162
Wh256	21217	Farewell Formation	Wharariki S	-40.5065	172.665	Farewell	Granitoid	S3	76.3962	0.109736	13.3778	0.209496	0.029928	0.109736	0.289304	4.57898	4.71865	0.019952	0.24	100.08	2	73	43	2	<1	19	13	13	3	13	231	<2	44	21	2	6	5	21	111
Wh260	21218	Farewell Formation	Wharariki S	-40.5065	172.665	Farewell	Granitoid	A	82.7665	0.19602	9.52657	2.57766	0.039204	0.352836	0.039204	0.382239	1.89159	0.019602	1.99	99.7815	1	1416	29	<1	6	10	21	22	<1	8	53	6	38	9	2	7	22	98	257
Wh266	21219	Farewell Formation	Wharariki S	-40.5065	172.665	Farewell	Granitoid	A	73.2755	0.23796	14.466	1.15014	0.009915	0.23796	0.1983	3.27195	5.59206	0.01983	0.85	99.3096	2	767	76	1	<1	16	53	19	2	23	232	2	183	35	4	20	15	20	213
Wh267	21220	Farewell Formation	Wharariki S	-40.5065	172.665	Farewell	Granitoid	A	62.3777	0.64155	18.4075	4.36254	0.04935	0.97713	1.20414	4.5402	5.31993	0.20727	1.3	99.3874	1	1060	61	<1	3	21	43	20	32	20	113	8	395	13	4	34	19	62	344
Wh273	21222	Farewell Formation	Wharariki S	-40.5065	172.665	Farewell	Granitoid	S3	77.2338	0.119652	12.7729	0.239304	0.009971	0.079768	0.209391	4.32741	4.65646	0.019942	0.29	99.9586	2	41	61	<1	<1	19	31	18	1	14	226	2	26	25	3	8	13	14	119
Wh283	21227	Farewell Formation	Wharariki S	-40.5064	172.666	Farewell	Granitoid	A	68.2711	0.42484	16.2724	3.09244	0.0494	0.77064	1.0374	4.2484	4.32744	0.11856	1.2	99.8126	2	740	63	13	<1	19	42	19	12	23	174	6	270	20	4	29	10	57	294
KR396	21174	Separation Point Suite	Kaituna Route	-40.6363	172.558	Separation Point Suite	Weathered granitoid	Knuckle Hill basement	69.2103	0.301103	17.9205	1.42781	0.019426	0.378807	0.573067	3.87549	2.81677	0.087417	2.87	99.4807	1	959	33	2	<1	19	36	10	2	22	73	6	564	7	2	12	2	51	224
KR397	21175	Separation Point Suite	Kaituna Route	-40.6363	172.558	Separation Point Suite	Aplite	Knuckle Hill basement	76.4754	0.029907	13.3784	0.259194	0.019938	0.049845	0.348915	4.67546	4.1172	0.009969	0.31	99.6743	1	55	11	<1	<1	22	<5	6	<1	31	164	3	79	3	2	3	2	20	55
MP040.1	21185	North Cape Formation	Maori Point	-40.5804	172.626	North Cape	Volcanic		68.196	0.629481	14.1957	4.95838	0.0677903	3.05056	0.852221	3.01183	1.62697	0.0387373	3.1567	99.7843	1	340	56	52	1	15	19	15	11	10	54	22	222	8	3	121	16	55	177
MP040.2	21186	North Cape Formation	Maori Point	-40.5804	172.626	North Cape	Volcanic		70.9244	0.594632	15.4733	0.877325	0.00974806	0.467907	0.155969	2.06659	6.31674	0.0682364	2.51939	99.4743	2	861	190	6	<1	18	132	17	4	27	218	4	207	30	6	37	43	34	399
MP040.3	21187	North Cape Formation	Maori Point	-40.5804	172.626	North Cape	Volcanic		76.39	0.351937	12.4358	2.55154	0.00977603	0.547458	0.136864	3.52915	1.94543	0.0586562	2.23972	100.196	3	471	71	12	5	12	39	13	1	7	76	6	165	13	2	35	25	22	187
MP040.4	21188	North Cape Formation	Maori Point	-40.5804	172.626	North Cape	Volcanic		65.9775	0.724654	16.9009	3.38825	0.0293779	1.28283	1.17512	6.74712	1.40035	0.127304	2.07373	99.8271	3	297	47	23	1	16	33	13	4	16	47	14	865	7	2	105	9	41	147
PP150.2	21207	North Cape Formation	Pecks Point S	-40.5729	172.634	North Cape	Volcanic		61.3693	0.794216	17.4822	6.62492	0.116227	3.36089	0.280881	5.68542	0.823273	0.0774845	3.14441	99.7593	2	320	73	53	2	18	36	16	13	20	26	23	256	6	3	175	17	83	132
PP158	21237	North Cape Formation	Pecks Point N	-40.569	172.627	North Cape	Volcanic		58.5392	0.981874	17.6073	9.15453	0.0770097	3.14777	1.02038	3.59058	1.983	0.154019	3.73784	99.9935	2	624	39	32	<1	19	24	5	10	13	56	25	313	2	1	253	18	68	58
PP168.2	21212	North Cape Formation	Pecks Point S	-40.5712	172.631	North Cape	Volcanic		66.3042	0.627608	15.8771	4.67764	0.0588383	2.09857	2.08876	5.61906	0.558964	0.0490319	1.93619	99.8959	1	276	58	37	<1	14	30	12	10	11	18	18	833	11	1	96	8	58	137
PP182	21243	North Cape Formation	Pecks Point S	-40.5724	171.634	North Cape	Volcanic		59.0234	0.717872	17.2148	6.48025	0.116412	4.74377	2.71627	5.06391	0.407441	0.261926	2.99031	99.7364	3	288	64	38	28	16	38	10	12	8	12	19	986	7	1	180	22	76	120
Pu213	21248	Farewell Formation	Puponga (river)	-40.5248	172.737	Farewell	Volcanic		79.4243	0.184578	12.518	1.40863	0.00971466	0.281725	0.0194293	0.27201	3.00183	0.0194293	2.85342	99.9931	2	471	112	16	<1	23	53	29	2	3	70	13	9	14	4	46	70	33	355

## Sheet: Clast petrology
Sample	Collection number	Field description	Polished?	Staining	Rock textures	Degree of alteration	Petrographic name	quartz	alkali feldspar	plagioclase	muscovite	biotite	chlorite	amphibole	clinopyroxene	opaques	apatite	titanite	tourmaline	other heavy minerals	glass shards	vesicle	groundmass	lithics	SUM
GH382	UC21180	grey metasedimentary	N	Kspar	Well sorted fine-grained subangular sand. All feldspars altered to grey clay (can't differentiate k-spar and plag).		fine feldsarenite	40	55			5													100
Mo017		vein quartz	N	Kspar	Interlocking, sutured qz with strongly undulose extinction. Medium grained.		quartzite	95			<1													5	100
MP037	UC21229	grey metasedimentary	N	Kspar	Equigranular fine sand quartz with minor micas. Polygonal/mosaic quartz, straight extinction		quartzite	90	2		5	3							<1	<1					100
MP352	UC21254	green metasedimentary	N	Kspar	Volcanic? Quartz siltstone with few fine sand grains of rounded (embayed?) plag, kspar, qz. Matrix has clusters of brown clay/opaques. Opaques are square.		siltstone
NR370	UC21193	green metasedimentary	N	Kspar	Quartz siltstone with few fine sand grains of plag, kspar, qz. Matrix has clusters of brown clay/opaques.		siltstone
Pu214	UC21249	grey metasedimentary	N	Kspar	fine sand grains in silt matrix. Sutured quartz boundaries, strongly undulose extinction. Foliated. Matrix supported		fine subfeldsarenite	90	10	0	<1														100
Pu226	UC21265	cream metasedimentary	N	Plag	Very fine sand grains with sutured grain boundaries. Undulose qz extinction		very fine subfeldsarenite	79	20		1														100
Pu228	UC21252	quartzite	N	Kspar	sutured strongly undulose quartz fs grains in silt matrix. Grain supported. No titanite, apatite, tourmaline		very fine subfeldsarenite	75	15	7						3				<1					100
Wh277.1	UC21226	red metasedimentary	N	Kspar	Subangular strongly undulose quartz grains, well sorted. Stain picks up clay along grain boundaries, also opaques.		fine quartzarenite	97	<1	3															100
Wh285	UC21271	quartzite	N	Kspar	Qz grains with strongly undulose extinction. Sutured grain boundaries. Loosely foliated (qz slightly tabular)		fine subfeldsarenite	85	15	0	<1	<1													100
KR396	UC21174	weakly foliated granitoid	N	Kspar	Weakly foliated with some qz ribbons, and foliation shown by micas. Some microcline.		Weakly foliated syeno-granite	33.0189	38.6792	16.0377	2.83019	9.43396	<1			<1		<1							100
KR397	UC21175	Aplite	N	Kspar	Mostly aplitic, equigranular, one end is coarse equigranular with micas.		Aplitic quartz-rich granitoid	61.6541	26.3158	10.5263	0	1.50376						0							100
MP038	UC21230	Dark granitoid	N	Kspar	Feldspar phenocrysts in a foliated, fine-grained matrix. Strongly undulose quartz. Microcline and perthite.		Foliated monzo-granite	30	45	20		5						0							100
MP342	UC21253	light granitoid	N	Kspar	equigranular course grained		Equigranular granodiorite	22.7723	18.8119	47.5248	0	5.94059	4.9505					0							100
MP356	UC21190	light granitoid	N	Kspar	equigranular course grained. Perthitic K-spar. Red-brown opaques		Equigranular syeno-granite	35	45	15						5									100
NR368	UC21192	Dark granitoid	N	Kspar	equigranular course grained		Equigranular alkali feldspar granite	40	55	5		<1	<1			<1		0							100
OP072	UC21232	Foliated granite	N	N	Foliation - alignment of micas. K-spar phenocrysts in groundmass of qz and mica		Foliated quartz-rich granitoid	50	32	0	5	10				3	<1								100
OP075	UC21233	light granitoid	Y	N	Equigranular, interlocking crystals		Equigranular syeno-granite	30	64	5		1						<1							100
P81311-F	(GNS collection)	Green Hills clast	N	Kspar	Fine grained ?granite, w/ fine qz groundmass and large, round qz phenos or recrystallised qz? Also bio and sericitised k-spar		Equigranular syeno-granite	45	35	10	5	5													100
P81313-A	(GNS collection)	Green Hills clast	N	Kspar	Equigranular weathered granite w/ qz and altered kspar, minor plag		Equigranular monzo-granite	30	40	30			<1					<1							100
P81313-C	(GNS collection)	Green Hills clast	N	Kspar	Foliated/deformed granite w/ qz groundmass, K-spar phenos, abundant, deformed musc and bio		Foliated syeno-granite	30	45	5	10	10													100
P81313-E	(GNS collection)	Green Hills clast	N	Kspar	Equigranular weathered granite w/ qz and altered kspar, minor plag		Equigranular monzo-granite	20	50	30		<1	<<1			<1	<<!	<1							100
P81315-B	(GNS collection)	Green Hills clast	N	Kspar	Foliated, biotite-rich granite, w/ k-spar phenocrysts and minor plag		Foliated quartz-rich granitoid	55	25	10	2	8													100
Pi311	UC21260	White weathered granite	N	Kspar	Equigranular course grained. Core lots of Fe oxide ppts.	low	Equigranular syeno-granite	35	55	10								0							100
Pi312.1	UC21202	White weathered granite	N	Kspar	Kspar phenocrysts in fine, foliated matrix, with quartz ribbons. Plag highly altered to sericite.	low	Foliated syeno-granite	35	45	10	4	5	1												100
Pi314	UC21261	Porphyritic weathered granite	N	Kspar	Thin section too broken up		Equigranular alkali feldspar granite	35.4167	56.25	4.16667	0	4.16667													100
PP147.2	UC21204	light granitoid	N	Kspar	equigranular medium grained. Strongly undulose extinction. Microcline.		Equigranular monzo-granite	25	40	30		5	<1												100
PP166.1	UC21239	Dark granitoid	N	Plag	Porphyritic, w/ qz phenocrysts.		Porphyritic quartz-rich granitoid	54.9669	21.8543	9.27152	2.64901	11.2583	0			0									100
PP166.2	UC21240	Dark granitoid	N	Plag	foliation - alignment of micas/amp		Foliated quartz monzonite	16	40	30	5	5				4	<1								100
PP167	UC21241	Light granitoid	N	Plag	interlocking equant kspar and quartz. Sutured grain boundaries.		Equigranular alkali feldspar granite	30	69	0	<1	1				0	<1	<1							100
PP173	UC21242		N	Kspar	equigranular course grained		Equigranular monzo-granite	20.4724	47.2441	30.7087		1.5748						0							100
PP184.1	UC21244	Dark granitoid	Y	N	equigranular, non-foliated		Equigranular syeno-granite	30	45	20	<1	5				<1	0	0							100
PP187	UC21245	Granitoid	N	Kspar	No foliation. Slight variation in grain size. Qz clustered together. Qz has strongly undulose extinction. Microcline.		Equigranular monzo-granite	49	30	20		1						0	<1						100
PP288	UC21263	Dark granitoid	N	Kspar	Kspar, perthitic, phenocrysts in aplitic, foliated matrix. Undulose quartz.		Foliated syeno-granite	45	35	15	5							0							100
PP289	UC21216	Light granitoid	N	Kspar	equigranular medium grained. Microcline.		Equigranular syeno-granite	25	60	14		1						0							100
Pu225	UC21251	White weathered granite	N		Interlocking equigranular crystals	low	Equigranular syeno-granite	30	69	0	0	0				1	0	0							100
Wh256	UC21217	Dark granitoid	N	Kspar	equigranular course grained		Equigranular monzo-granite	20	50	30		<1						0							100
Wh266	UC21219	Dark granitoid	N	Kspar	Fine grained, strongly foliated. Strongly undulose quartz, sutured boundaries		Foliated monzo-granite	40	30	20	7	3													100
Wh273	UC21222	Red granitoid	N	Kspar	equigranular course grained. Perthitic K-spar		Equigranular monzo-granite	30	44	25								1							100
Wh283	UC21227	Dark granitoid	N	Kspar	Feldspar phenocrysts in a foliated, fine-grained matrix. Strongly undulose quartz. Microcline.		Equigranular monzo-granite	30.2326	26.7442	25.5814	0	17.4419													100
GH379	UC21177	Black volcanic	N	N	Plag totally replaced by fine grey mineral. Quartz embayed	high	Highly altered volcanic	10		20													70		100
MP040.1	UC21185	Green volcanic	Y	N	Porphyritic. Tabular plag phenocrysts saussuritised, sericitised and albitised. No original twinning. Chl replacing amphibole phenocrysts. Vesicle rimmed by quartz. Groundmass V.fine grained sericite, quartz, zoisite chlorite	moderate	Moderately altered porphyritic andesite/basalt	0		20			1									5	74		100
MP040.2	UC21186	Green volcanic	N	N	Porphyritic, weakly flow banded. Almost entirely replaced by v. fine grained silica/albite/sericite. Amps shown by chlorite, opaques. Embayed quartz	very high	Very highly altered volcanic
MP040.3	UC21187	Green volcanic	Y	N	Silicified tuff: equgranular, very coarse sand. Tuff - silicified glass shards. Embayed quartz. Seritised plag. Chloritsed amp.	moderate	Silicified alkali feldspar tuff	10	10					1							5		74		100
MP040.4	UC21188	Green volcanic	Y	N	Porphyritic. Completely sericitised plag phenocrysts. Chloritised amphible. Clinopyroxene phenocrysts rims replaced by chlorite. Groundmass v.fine grained quartz, zoisite, sericite	moderate	Moderately altered porphyritic andesite/basalt			15				10	5								70		100
MP354	UC21255	Green volcanic	N	N	Porphyritic, weakly flow banded. Plag phenocrysts embayed, fractured, albitised and sericitised. Chloritised amphibole. Groundmass has microlites and very fine grained sericite, albite	moderate	Moderately altered porphyritic andesite/basalt			30				5									65		100
MP355	UC21256	Green volcanic	N	N	Equigranular medium grained. Alkali feldspar altered, difficult to tell from plag	low	Silicified rhyolite	60	25		1	14													100
NR372		Green volcanic	N	N	Porphyritic. Alkali feldspar altered with remnant perthite. Plag seritised, but have poly twinning. Glassy groundmass replaced by chlorite in some places, otherwise is fine grained albite, sericite, quartz, biotite.	moderate	Moderately altered porphyritic andesite/basalt		5	30		3		2									60		100
OP074	UC21259	Green volcanic	Y	N	Porphyritic, hypabyssal. Embayed quartz. Groundmass is medium to fine grained plag, bio, chl, opaques, qz	very low	Porphyritic andesite/basalt	1		25				5									69		100
Pi306	UC21198	Green volcanic	N	N	Porphyritic. Embayed quartz, completely albitised plag, chloritized amphibole. Groundmass is medium quartz xtls in fine grained albite, chlorite, zoisite	high	Highly altered volcanic	15	0	10				10									65		100
Pi307.1	UC21199	Green volcanic	N	N	Silicified and chloritised groundmass, only hints of primary porphyritic texture remain	very high	Very highly altered volcanic																		0
Pi307.2	UC21200	Green volcanic	N	N	Porphyritic. Completely saussuritized plag, chloritised amphibole. Groundmass very fine grained quartz, sericite, zoisite chlorite	high	Highly altered porphyritic andesite/basalt			15				15									70		100
Pi307.3	UC21201	Green volcanic	N	N	Equigranular coarse grained?. Or angular plag phenos? Highly silicified - see chert in DRM124. Qz and chlorite in voids.	very high	Very highly altered volcanic																		0
PP182	UC21243	Green volcanic	N	N	Porphyritic in glassy groundmass, weak flow-banding. Possible plag/cpx glomerocrysts. Plag phenocrysts have compositional zoning and poly twinning	moderate	Porphyritic andesite/basalt	<1	5	30			1		<1	5							59		100
PP430	UC21264	Black volcanic	N	N	Plag completely sericitised, whole thing is very fine grained sericite, biotite, silica, albite. Voids filled w/ qz.	very high	Very highly altered volcanic																		0
Pu213	UC21248	Red volcanic	N	N	Totally replaced by fine grained sericite, zoisite, albite, silica. Some tabular forms could be plag phenos.	very high	Very highly altered volcanic																		0
Wh255	UC21267	Green volcanic	N	N	Porphyritic, weakly flow banded. Tabular plagioclase sericitised and albitised. Chloritised amphibole. Groundmass disseminated opaques, v.fine grained sericite, zoisite chlorite	moderate	Moderately altered porphyritic andesite/basalt	0		25			15										60		100
Wh260	UC21218	Green volcanic	N	N	Very fine grained albite, sericite, zoisite, silica. Angular forms poss plag phenos.	very high	Very highly altered volcanic																		0
Wh271	UC21221	Green volcanic	N	N	Porphyritic. Embayed quartz. Alkali feldspar heavily seritised, but some show simple twins. Plag sericitised but still shows twinning. Chloritised amphibole. Groundmass is fine grained quartz, chlorite, feldspar, opaques	low	Porphyritic rhyolite	3	6	5				1									85		100
Wh272	UC21268	Green volcanic	N	N	Porphyritic. Plag phenocrysts sericitised and albitised some with original twinning. Chloritised amphibole. Groundmass disseminated opaques, v.fine grained sericite, zoisite chlorite	moderate	Moderately altered porphyritic andesite/basalt	0		25			10			3							62		100
Wh275	UC21223	Green volcanic	N	N	Porphyritic. Plag completely saussuritized. Amphibole completely chloritised. Groundmass v.fine grained sericite, zoisite chlorite	high	Highly altered porphyritic andesite/basalt	0	0	15				1									84		100
Wh276	UC21224	Green volcanic	N	N	Porphyritic. Tabular plag phenocrysts sericitised and albitised, some w/ original twinning. Euhedral amphibole chloritised. Groundmass very fine grained quartz, feldspar, chlorite	low	Porphyritic andesite/basalt	0		25				5								5	65		100
Wh276.2	UC21225	Green volcanic	N	K-spar	Porphyritic, weakly flow banded. Embayed quartz. Sericitised plag still shows twinning. Chloritised amphibole. Groundmass fine grained quartz, chlorite, feldspar, opaques	Very low	Porphyritic andesite/basalt	1	2	5				<1									92		100
Wh276.3	UC21269	Green volcanic	N	Kspar	Porphyritic medium grained. Very embayed quartz, pag, k-spar phenocrysts. Groundmass medium grained plag, kspar, disseminated chlorite	very low	Porphyritic andesite/basalt	5	5	30													60		100
Wh278.1	UC21270	Green volcanic	N	Kspar	Very fine grained brown sericite, clays. Angular forms poss plag phenos. Vesicular	very high	Very highly altered volcanic																		0

## Sheet: Sandstone petrology
Lab number	Collection number	Formation	Location	Latitude (WGS 84)	Longitude (WGS 84)	Grain size (ɸ)	Matrix silt/clay	Matrix organics	Matrix void	Matrix iron oxide	Quartz straight extinction	Quartz undulose	Quartz polycrystalline	Plagioclase	Alkali feldspar	Microcline	Sedimentary lithic	Chert lithic	Metasedimentary lithic	Schist lithic	Plutonic lithic	Volcanic lithic	Muscovite	Biotite	Chlorite	Glauconite	Heavy minerals	Detrital opaques	Total counts
BR404	UC21272	Rakopi	Pakawau Bush Rd	-40.5857	172.666	0.5	96	0	8	37	43	62	17	17	70	35	0	1	37	0	9	1	0	0	0	0	0	0	433
BR408	UC21273	Rakopi (Otimataura)	Pakawau Bush Rd	-40.5865	172.67	2.5	27	52	19	0	54	75	14	0	6	0	0	0	105	0	4	1	23	3	0	0	0	2	385
BR409	UC21274	Rakopi (Otimataura)	Pakawau Bush Rd	-40.5864	172.67	2.5	10	4	30	2	49	198	0	1	8	0	0	0	20	2	0	1	42	0	0	0	0	6	373
BR412	UC21275	Rakopi (Otimataura)	Pakawau Bush Rd	-40.5856	172.669	0.5	75	5	7	0	8	23	28	2	8	2	0	0	153	0	27	0	2	3	0	0	0	0	343
BR425	UC21276	Rakopi	Pakawau Bush Rd	-40.5834	172.657	2.5	30	0	29	9	88	33	9	41	70	9	0	0	53	3	3	11	0	3	0	0	0		391
GH376	UC21277	Farewell	Green Hills Beach	-40.5067	172.655	1.5	93	0	18	6	74	50	10	2	68	27	0	0	45	3	4	18	1	16	0	0	0	1	436
KR004	UC21278	Rakopi	Kaituna Route	-40.6257	172.545	1.6	83		19	1	91	86	18	50	65	39	0	3	52	25	9	15	0	0	8	6	0	0	570
KR005	UC21279	Rakopi	Kaituna Route	-40.6225	172.547	2.3	259	0	8	0	65	81	5	99	49	23	0	3	23	2	4	6	5	9	0	2	0	1	644
KR006	UC21280	Rakopi	Kaituna Route	-40.6211	172.547	2.6	146		0	0	82	79	7	79	72	30	0	8	13	2	3	0	10	55	9	0	0	3	598
KR009	UC21281	Rakopi	Kaituna Route	-40.6174	172.549	1.8	115		33	0	77	67	5	177	64	8	0	5	16	7	10	7	0	9	0	2	0	0	602
Mo014	UC21282	Farewell	Moki Point	-40.5847	172.563	0.29	56	0	66	0	116	51	12	75	50	45	0	7	62	5	19	9	1	13	0	0	0		587
Mo021	UC21283	North Cape	Moki Point	-40.582	172.573	0.87	65	0	48	1	105	70	13	76	58	29	0	5	61	2	15	42	1	22	0	0	0	0	613
Mo023	UC21284	North Cape	Moki Point	-40.5812	172.573	2.2	173	1	4	0	84	102	6	58	33	15	0	5	72	12	0	5	8	53		0	2	3	636
Mo025	UC21285	Farewell	Moki Point	-40.5793	172.57	1.1	71	0	21	0	111	29	10	78	19	23	0	3	50	6	8	28	1	21	3	0	0	1	483
Mo026	UC21286	Farewell	Moki Point	-40.5784	172.57	1.3	75	0	6	2	99	55	9	107	35	27	0	2	59	10	2	12	5	41	0	0	3	0	549
Mo250	UC21287	Farewell	Moki Point			-0.49	22	0	34	0	85	53	15	23	43	18	0	9	89	3	8	6	0	1	0	0	1		410
MP029	UC21288	North Cape	Maori Point	-40.5812	172.628	1.5	31	0	32	71	79	36	11	40	47	12	0	0	38	1	6	6	1	2	0	7	0		420
MP031	UC21289	North Cape	Maori Point	-40.5808	172.627	1.5	40	0	32	16	57	34	6	51	28	15	0	0	28	1	2	12	0	5	0	8	0	0	335
MP032	UC21290	North Cape	Maori Point	-40.5809	172.627	1.5	12	0	62	9	84	47	6	43	56	14	0	0	26	2	3	6	1	17	1	4	0	0	393
MP035	UC21291	North Cape	Maori Point	-40.5799	172.625	1.5	24	0	67	8	79	59	6	40	107	8	0	0	50	3	8	29	1	3	1	12	0	1	506
MP036	UC21292	North Cape	Maori Point	-40.5796	172.625	2.5	16	0	44	30	76	25	3	20	83	10	0	0	37	0	6	6	0	6	1	1	0	1	365
MP044	UC21293	North Cape	Maori Point	-40.5804	172.626	0.5	11	0	63	15	64	33	8	43	58	34	0	0	51	0	4	11	0	5	0	4	0	0	404
MP335	UC21294	North Cape	Maori Point	-40.5798	172.625	1.5	21	0	62	8	55	35	1	22	69	13	0	0	38	2	0	11	0	16	0	3	0	0	356
MP336	UC21295	North Cape	Maori Point	-40.5802	172.625	0.5	5	0	45	4	55	21	17	30	39	25	0	1	26	3	12	13	0	11	0	1	0	0	308
MP338	UC21296	North Cape	Maori Point	-40.581	172.627	0.5	2	0	76	54	63	33	11	38	44	23	0	1	40	2	23	11	0	2	0	1	0	0	424
MP339	UC21297	North Cape	Maori Point	-40.581	172.628	-0.5	25	0	70	24	31	23	4	29	54	23	0	0	64	8	20	16	0	2	0	1	0	1	395
MR045	UC21298	North Cape	Mangarakau River	-40.6389	172.522	1.5	15	0	43	19	107	45	4	22	59	15	0	4	42	5	7	3	1	49	1	3	0	1	445
MR048	UC21299	North Cape	Mangarakau River	-40.6369	172.521	1.5	13	0	64	44	116	52	14	32	70	22	0	5	35	8	11	9	0	5	0	12	0	0	512
MR051	UC21300	North Cape	Mangarakau River	-40.6338	172.518	2.5	21	0	81	15	103	43	5	27	50	27	0	4	31	2	12	13	1	14	0	12	0	0	461
MR052	UC21301	North Cape	Mangarakau River	-40.6308	172.517	2.5	10	0	124	18	97	49	5	29	49	8	0	2	43	3	14	13	4	14	0	7	0	0	489
MS053	UC21302	North Cape	Mangarakau Swamp	-40.6224	172.514	3.5	13	0	29	22	96	40	2	9	80	2	0	0	21	0	24	3	10	42	1	7	0	0	401
MS055	UC21303	North Cape	Mangarakau Swamp	-40.6224	172.514	3.5	18	0	28	122	76	39	4	35	60	17	0	0	28	3	4	6	3	14	0	5	0	0	462
MS056	UC21304	North Cape	Mangarakau Swamp	-40.6242	172.512	1.5	9	0	39	70	102	81	10	9	70	28	0	0	11	1	49	0	5	7	0	1	0	0	492
NR363		Farewell	Nguroa Road	-40.5342	172.639	0.5	42	0	17	19	37	25	16	18	49	14	0	0	95	5	13	8	0	11	0	0	0	0	369
NR364		Farewell	Nguroa Road	-40.5351	172.639	1.5	20	0	31	21	51	58	6	40	51	16	0	0	44	2	4	11	1	8	0	0	0	0	364
OP057	UC21307	North Cape	Oyster Point	-40.5715	172.6	2.6	89	0	2	0	87	39	2	123	33	10	0	8	26	6	2	2	10	110	0	0	0	2	551
OP058	UC21308	Farewell	Oyster Point	-40.5702	172.599	0.97	69	0	65		88	66	7	82	12	40	0	0	64	5	2	38	1	31	0	0	0	2	572
OP061	UC21309	North Cape	Oyster Point	-40.5707	172.599	0.44	120	1	15	0	126	50	12	48	56	37	0	10	51	4	24	3	0	5	1	0	1	4	568
OP065	UC21310	Farewell	Oyster Point	-40.5701	172.599	0.97	50	0	16	0	82	39	3	88	20	28	0	2	33	9	4	16	5	25	1	0	0		421
OP069	UC21311	Farewell	Oyster Point	-40.5683	172.595	-0.063	30	0	39	0	102	49	19	63	83	46	0	4	54	4	11	17	0	6	0	0	2		529
OP070	UC21312	Farewell	Oyster Point	-40.5684	172.596	2	93	0	24	3	67	46	15	117	15	42	0	0	45	2	0	25	7	55	3	0	1	4	564
OP326	UC21313	North Cape	Oyster Point	-40.5711	172.599	1.5	90	0	20	3	82	57	6	10	83	17	1	0	47	3	6	11	0	6	0	0	0	0	442
OP327	UC21314	North Cape	Oyster Point	-40.5711	172.599	1.5	113	0	21	0	96	36	7	15	68	23	0	2	75	5	6	12	2	34	0	0	0	1	516
OP328	UC21315	North Cape	Oyster Point	-40.571	172.599	1.5	132	0	7	27	92	43	8	6	52	30	0	3	66	4	3	17	3	34	2	0	0	2	531
OP329	UC21316	North Cape	Oyster Point	-40.5707	172.599	0.5	109	2	11	17	80	71	24	8	81	45	3	0	51	10	10	17	3	3	0	0	1	0	546
OP331	UC21317	Farewell	Oyster Point	-40.57	172.599	0.5	55	0	18	1	80	44	11	36	58	10	2	2	31	1	13	11	4	27	1	0	0	0	405
Pi079	UC21318	Farewell	Pillar Point	-40.5045	172.713	0.5	1	0	66	68	87	144	64	2	27	17	0	0	9	0	14	0	0	0	0	114	0	3	616
Pi080	UC21319	Farewell	Pillar Point	-40.5046	172.713	0.5	76		12		145	35	16	32	22	6	0	0	31	15	0	0				0	0		390
Pi088	UC21320	Farewell	Pillar Point	-40.5047	172.713	1	76	1	25		125	75	18	42	9	13	0	0	63	2	0	0	1			0	0	1	451
Pi089	UC21321	Farewell	Pillar Point	-40.5047	172.713	0.5	128		14		149	63	1	47	13	13	0	0	65		4	0	1			0	0		498
Pi092	UC21322	Farewell	Pillar Point	-40.5048	172.713	1	118		12		104	80	21	53	17	30	0	0	33	12	0	0	5	1		0	1	8	495
Pi095	UC21323	Farewell	Pillar Point	-40.5051	172.713	1.5	91	0	9	0	68	70	6	28	45	1	0	0	55	8	3	0	2	4	0	0	0	0	390
Pi097	UC21324	Farewell	Pillar Point	-40.5053	172.713	1.5	55	0	4		65	12	10	35	2	6	0	0	14	0	0	0		3		0	0		206
Pi099	UC21325	Farewell	Pillar Point	-40.5057	172.713	1.5	112	0	16	24	58	73	15	5	42	5	0	0	34	2	1	7	1	2	0	0	0	0	397
Pi100	UC21326	Farewell	Pillar Point	-40.5057	172.713	1.5	133	5	40		103	62	28	57	4	15	0	0	21	4	0	0	1	6	2	0	0	11	492
Pi110	UC21327	Farewell	Pillar Point	-40.5072	172.714	1.5	75	0	13	0	81	60	3	6	22	20	0		59	6	3	0	0	3	1	0	0		352
Pi115	UC21328	Farewell	Pillar Point	-40.5072	172.713	-0.5	20	0	6	0	44	39	2	7	26	5	0	0	55	1	0	9	0	0	0	0	0	0	214
Pi125	UC21329	Farewell	Pillar Point	-40.5075	172.712	1.5	120	2	14	0	83	48	14	3	40	18	0	1	48	4	1	2	3	12	0	0	0	1	414
Pi127	UC21330	Farewell	Pillar Point	-40.5078	172.712	1.5	114	0	3	6	75	66	15	2	47	32	0	1	33	3	3	1	2	10	0	0	1		414
Pi128	UC21331	Farewell	Pillar Point	-40.5081	172.712	2.5	72	0	2	0	83	58	6	6	39	17	0	0	41	6	1	0	0	18	1	0	0	23	373
Pi130	UC21332	Farewell	Pillar Point	-40.5084	172.712	2.5	70	0	4	0	38	62	4	12	63	22	0	0	45	5	8	0	1	28	0	0	0	1	363
Pi134	UC21333	Farewell	Pillar Point	-40.5095	172.71	1.5	197	0	31	0	37	50	6	6	22	26	0	0	50	6	11	1	1	17	0	0	0	1	462
Pi136	UC21334	Farewell	Pillar Point	-40.5096	172.709	0.5	54	0	7	2	75	68	2	1	37	42	0	2	47	6	1	4	1	8	1	0	0		358
Pi138	UC21335	Farewell	Pillar Point	-40.5098	172.709	2.5	94	0	0	1	70	44	4	11	55	17	0	1	35	11	2	0	7	41	0	0	0		393
Pi142	UC21336	Farewell	Pillar Point	-40.5103	172.709	1.5	63	0	6	1	48	24	9	20	65	11	0	0	30	0	1	6	1	26	0	0	0	0	311
Pi144	UC21337	Farewell	Pillar Point	-40.5105	172.709	1.5	79		8	0	48	58	5	21	38	21	0	0	65	3	4	5	3	15	0	0	0	0	373
PM388	UC21338	North Cape	Puponga Mine track	-40.5195	172.711	1.5	95	0	19	1	62	51	14	32	73	20	0	0	30	5	0	20	3	8	2	0	0	0	435
PP146	UC21339	North Cape	Pecks Point	-40.5729	172.634	1.7	20		13	0	71	69	6	57	71	39	0	4	56	1	7	9	9	26	0	1	0	1	460
PP153	UC21340	North Cape	Pecks Point	-40.5688	172.627	2.7	78		45	0	75	87	4	132	61	22	0	0	32		0	3	9	62	1	2	0	4	617
PP164	UC21341	North Cape	Pecks Point	-40.5715	172.631	1.7	8	0	98	0	51	58	2	97	36	52	0	1	36	5	13	16	5	20	0	4	0	1	503
PP174	UC21342	North Cape	Pecks Point	-40.5716	172.633	1.99	60	0	2	0	49	59	0	27	50	51	0	0	19	0	2	0	4	10	0	2	0	1	336
PP175	UC21343	North Cape	Pecks Point			1.9	33	0	136	0	22	114	4	116	46	53	0	4	52	1	22	7	2	50	0	2	0	1	665
PP176	UC21344	North Cape	Pecks Point	-40.5688	172.628	2.4	112	0	31	0	94	115	8	41	112	42	0	4	32	4	1	2	14	14	5	0	4	10	645
PP177	UC21345	North Cape	Pecks Point	-40.5688	172.628	1.9	13	0	45	17	59	47	12	118	29	18	0	0	40	6	0	26	5	16	1	3	0	1	456
PP180	UC21346	North Cape	Pecks Point	-40.5715	172.631	1.9	11		2		19	37	2	21	36	17	0	0	11	0	1	2	9	8	0	0	0	0	176
PP190	UC21347	North Cape	Pecks Point	-40.5724	171.634	1.1	23		58		77	85	18	60	55	54	0	0	36	8	11	36	3	21	1	5	0	2	472
PP295	UC21348	North Cape	Pecks Point	-40.5688	172.628	-0.5	3	0	115	14	45	36	10	44	27	31	0	0	144	5	7	48	0	2	0	1	1	0	533
PP296	UC21349	North Cape	Pecks Point	-40.5688	172.628	-0.5	0	0	111	18	33	53	8	27	46	36	14	0	92	0	43	28	0	0	0	7	0	0	516
PP299	UC21350	North Cape	Pecks Point	-40.569	172.627	0.5	53	0	55	15	41	81	13	25	60	27	4	4	61	1	27	40	1	7	0	0	0	0	515
PP301	UC21351	North Cape	Pecks Point	-40.5686	172.626	1.5	22	0	62	18	64	72	5	42	69	12	0	0	83	6	19	21	1	23	0	0	0	0	519
PP304	UC21352	North Cape	Pecks Point	-40.5687	172.626	1.5	38	0	56	26	56	50	25	30	53	51	0	0	83	4	14	24	0	3	0	0	0	0	513
PP426	UC21353	North Cape	Pecks Point	-40.5729	172.634	0.5	5	0	50	24	55	36	14	31	26	14	0	0	55	4	15	31	0	18	1	3	0	0	382
PP427	UC21354	North Cape	Pecks Point	-40.5725	172.634	1.5	3	0	70	2	46	72	6	45	51	15	0	0	32	2	7	10	0	9	0	7	0	0	377
PP428	UC21355	North Cape	Pecks Point	-40.5718	172.633	0.5	1	0	68	1	40	59	15	45	56	15	0	0	29	2	10	19	0	9	0	3	0	0	372
PP429	UC21356	North Cape	Pecks Point	-40.5714	172.632	1.5	6	0	69	9	77	56	20	45	55	19	1	0	43	6	13	18	1	13	1	3	0	0	455
PR199	UC21357	Rakopi	Paturau River	-40.6708	172.477	2.5	135	0	15	0	111	127	14	5	59	36	0	2	79	12	5	5	1	15	5	1	0	6	633
PR200	UC21358	Rakopi (Otimataura)	Paturau River	-40.6825	172.485	1.5	40	0	4	0	72	65	35	1	1	0	0	4	153	161	3	1	3	2	1	0	0	5	551
Pu203	UC21359	Farewell	Puponga Point	-40.5245	172.737	1.5	149	0	31	72	89	67	11	0	51	14	0	1	60	1	1	6	4	3	0	0	2	4	566
Pu207	UC21360	Farewell	Puponga Point	-40.5248	172.737	0	52	0	15	0	100	99	20	30	13	13	0	0	154	6	1	3	1	1	0	0	0	2	510
Pu215	UC21361	Farewell	Puponga Point	-40.5249	172.737	0.5	89	2	33	0	87	83	22	4	35	33	0	0	105	3	7	0	2	1	0	0	0	1	507
Pu216	UC21362	Farewell	Puponga Point	-40.525	172.737	0.5	99	0	12	1	157	91	17	52	39	16	0	1	80	7	0	3	5	0	0	0	0	2	582
Pu218	UC21363	Farewell	Puponga Point	-40.5252	172.737	1.5	135	2	5	4	99	81	15	2	69	13	0	0	108	5	1	1	1	0	0	0	0	0	541
Pu219	UC21364	Farewell	Puponga Point	-40.5251	172.738	-0.5	51	0	3	0	78	65	6	34	16	14	0	1	79	0	0	5	0	0	0	0	0	1	353
Pu221	UC21365	Farewell	Puponga Point	-40.5251	172.738	1.5	0	0	34	67	80	76	17	0	15	5	0	0	1	0	1	0	0	0	0	7	0	0	303
TH235	UC21367	Farewell	Te Hapu Rd	-40.614	172.514	1.5	45		25		52	113	8	61	60	48	0	6	78	10	14	7	1	14	0	0	0	8	550
TH236	UC21368	Farewell	Te Hapu Rd	-40.6124	172.514	0	42	0	31	0	34	142	6	23	37	90	0	14	97	5	19	2	1	3	0	0	0	2	548
TH240	UC21369	Farewell	Te Hapu Rd	-40.6127	172.514	1.5	63	0	47	1	70	99	9	33	47	70	0	3	100	4	5	3	2	28	0	0	0	1	585
TH241	UC21370	Farewell	Te Hapu Rd	-40.611	172.515	1.5	67	0	31	0	40	93	4	68	8	12	0	3	59	5	5	0	5	50	1	0	0	0	451
TH415	UC21371	Farewell	Te Hapu Rd	-40.615	172.513	2.5	133	5	3	1	57	56	7	8	55	16	0	0	29	9	7	3	3	43	3	0	0	1	439
TH417	UC21372	Farewell	Te Hapu Rd	-40.6132	172.512	1.5	27	0	21	0	78	30	0	8	62	20	0	0	12	1	2	1	5	67	1	0	0	0	335
TH419	UC21373	Farewell	Te Hapu Rd	-40.6184	172.511	2.5	47	1	5	1	70	60	5	11	35	6	0	0	52	5	1	7	3	39	1	0	0	2	351
TH421	UC21374	North Cape	Te Hapu Rd	-40.6184	172.511	3.5	21	0	30	0	88	33	0	4	54	9	0	0	17	0	3	0	1	85	0	0	0	1	346
TH422	UC21375	Farewell	Te Hapu Rd	-40.6189	172.509	1.5	27	0	4	0	55	51	6	11	37	9	0	0	31	10	3	1	5	87	0	0	0	0	337
Wh242	UC21376	Farewell	Wharariki Beach	-40.5044	172.673	0.5	108		8	1	143	79	18	30	26	59	0	0	96	9	3	6	3	12	0	0	0	5	606
Wh244	UC21377	Farewell	Wharariki Beach	-40.5063	172.665	1.5	97		13	3	100	75	7	50	93	65	0	2	37	12	9	1	2	26	12	0	0	4	608
Wh245	UC21378	Farewell	Wharariki Beach	-40.5058	172.666	1.5	49	0	0	0	40	71	8	23	19	58	0	1	31	0	0	0	0	14	0	0	0	0	314
Wh268	UC21379	Farewell	Wharariki Beach	-40.5066	172.665	1.5	90	0	33	0	60	102	2	35	95	19	0	1	44	2	5	3	1	12	0	1	0	0	505
Wh269	UC21380	Farewell	Wharariki Beach	-40.5064	172.666	1.5	27	0	36	1	69	88	6	30	85	23	0	1	51	7	8	18	0	24	0	1	0	0	475
